# Supplementary material for: Influence of catalytic systems in Stille polymerization on the electrochromic performance of diketopyrrolopyrrole-based conjugated polymers
Source: Royal Society of Chemistry journal article supplement (doi:10.1039/c7qm00377c), 2017-12-13
Supplement: c7qm00377c1.pdf [file c7qm00377c1.pdf]

**Electronic Supporting Information for**  
**Influence of Catalytic System in Stille Polymerization on the**  
**Electrochromic Performance of Diketopyrrolopyrrole-Based**  
**Conjugated Polymers**

Wei Teng Neo,<sup>1,2</sup> Qun Ye,<sup>1</sup> Zugui Shi,<sup>1</sup> Soo-Jin Chua,<sup>1,3</sup> Jianwei Xu<sup>1,4</sup>

<sup>1</sup>Institute of Materials Research and Engineering, A\*STAR (Agency for Science, Technology and Research), 2 Fusionopolis Way, Innovis, #08-03, Singapore 138634

<sup>2</sup>NUS Graduate School for Integrative Sciences and Engineering, National University of Singapore, 28 Medical Drive, Singapore 117456

<sup>3</sup>Department of Electrical and Computer Engineering, National University of Singapore, 4 Engineering Drive 3, Singapore 117583

<sup>4</sup>Department of Chemistry, National University of Singapore, 3 Science Drive 3, Singapore 117543

Correspondence to: Dr. Jianwei Xu (E-mail: [jw-xu@imre.a-star.edu.sg](mailto:jw-xu@imre.a-star.edu.sg))

**Contents**

1. NMR of polymers
2. GPC of polymers
3. Cyclic voltammograms of polymers
4. XRD spectra of polymer thin films
5. Redox stability of ECDs

## 1 NMR of polymers

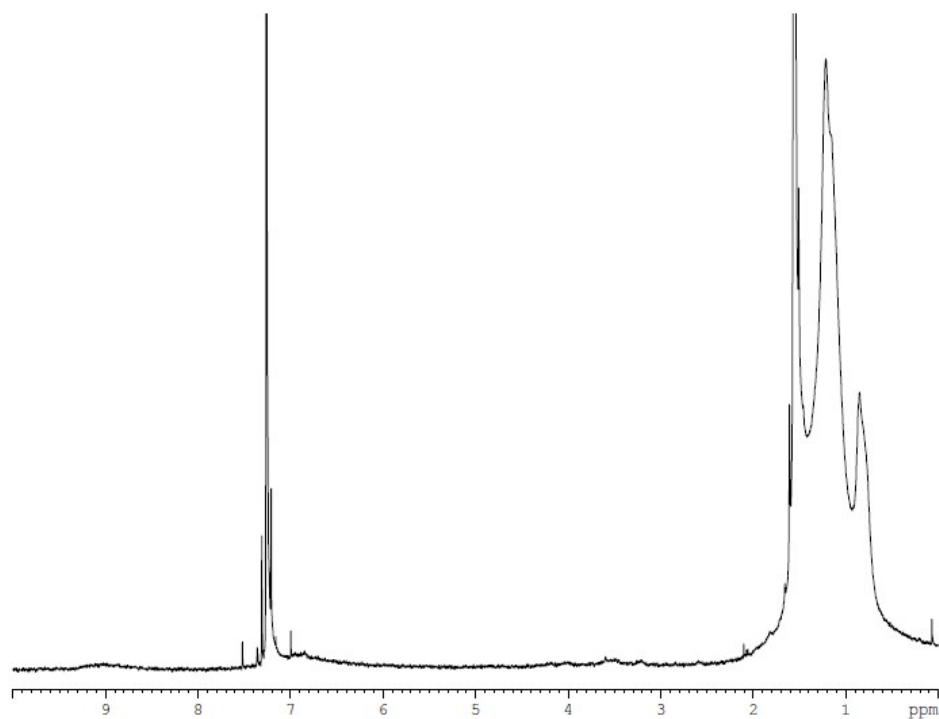

**Figure S1**  $^1\text{H}$  NMR spectrum of **P1** in  $\text{CDCl}_3$  at  $25^\circ\text{C}$ .

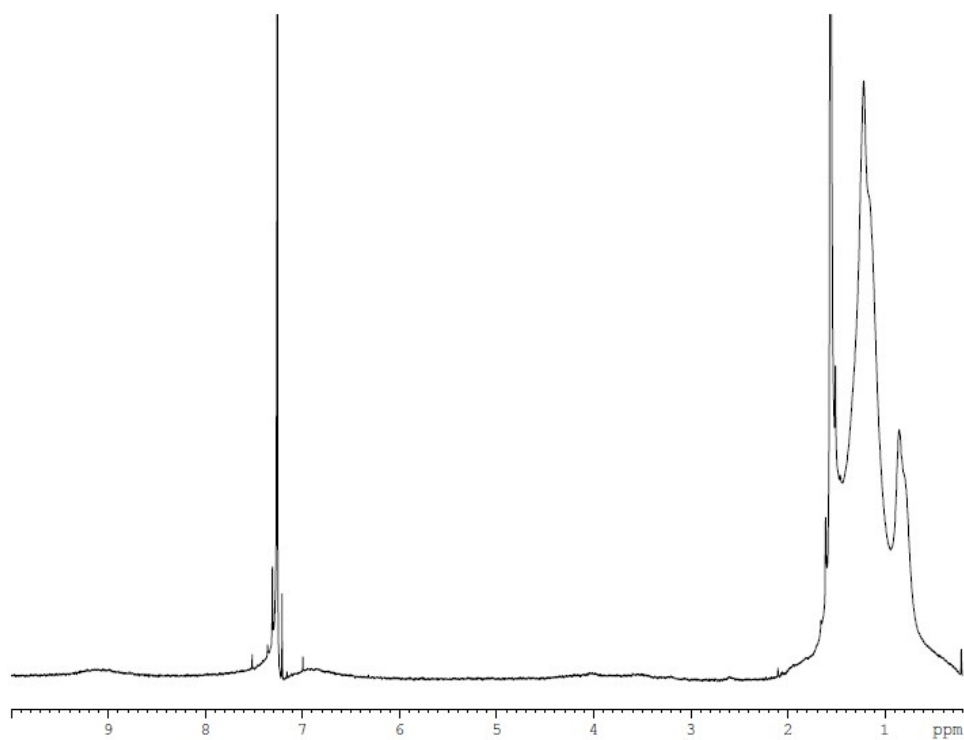

**Figure S2**  $^1\text{H}$  NMR spectrum of **P2** in  $\text{CDCl}_3$  at  $25^\circ\text{C}$ .

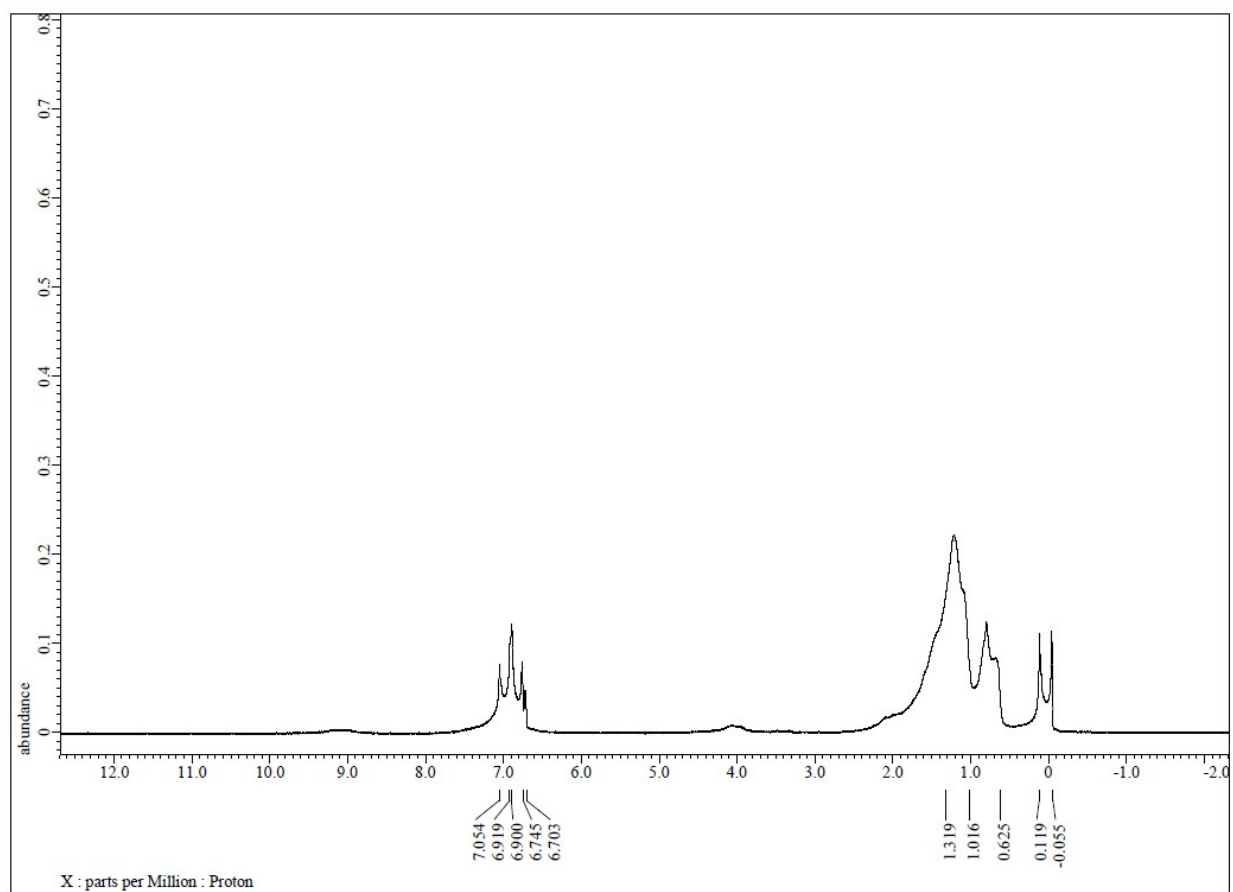

**Figure S3.**  $^1\text{H}$  NMR spectrum of **P2** in  $\text{C}_6\text{D}_5\text{Cl}$  at  $125^\circ\text{C}$ .

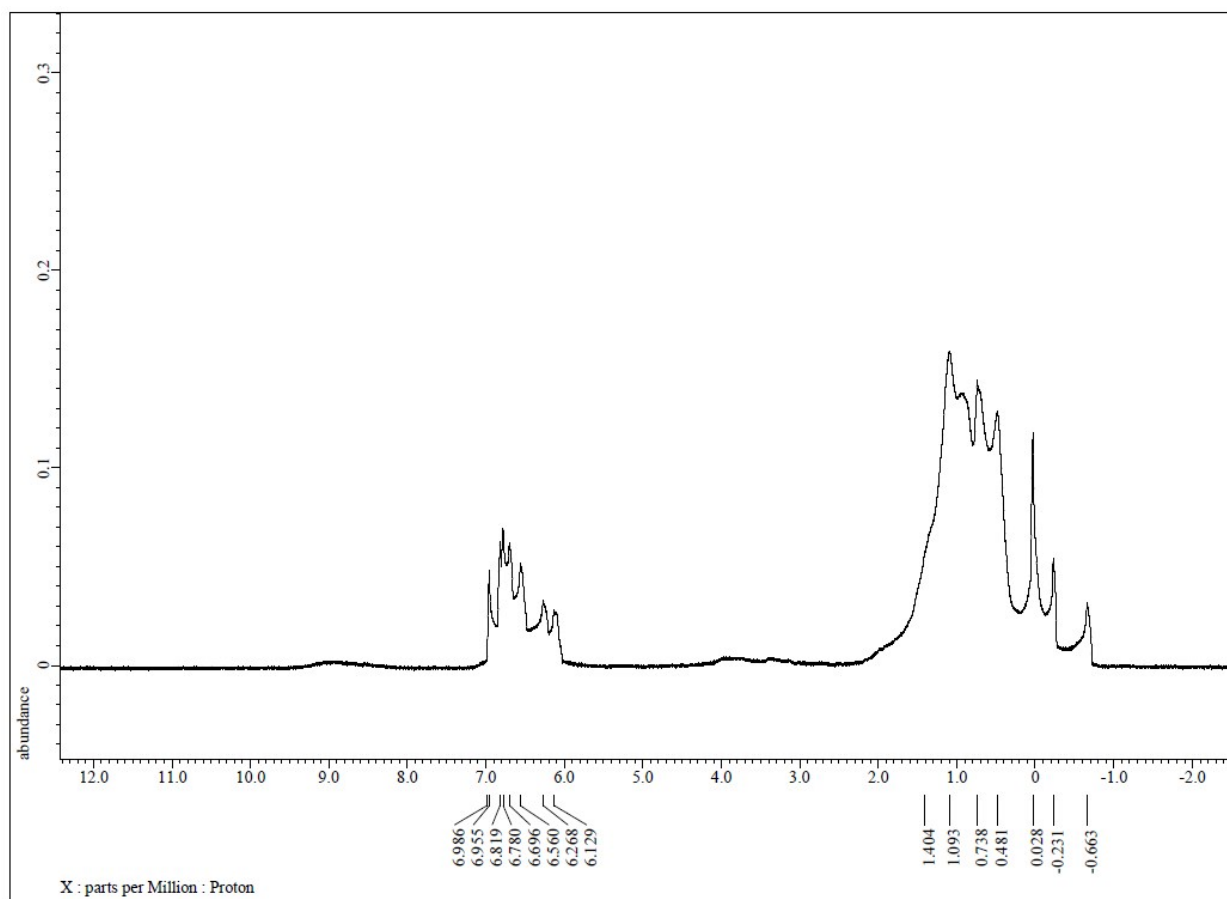

**Figure S4.**  $^1\text{H}$  NMR spectrum of **P2** in  $\text{C}_6\text{D}_5\text{Cl}$  at  $100^\circ\text{C}$ .

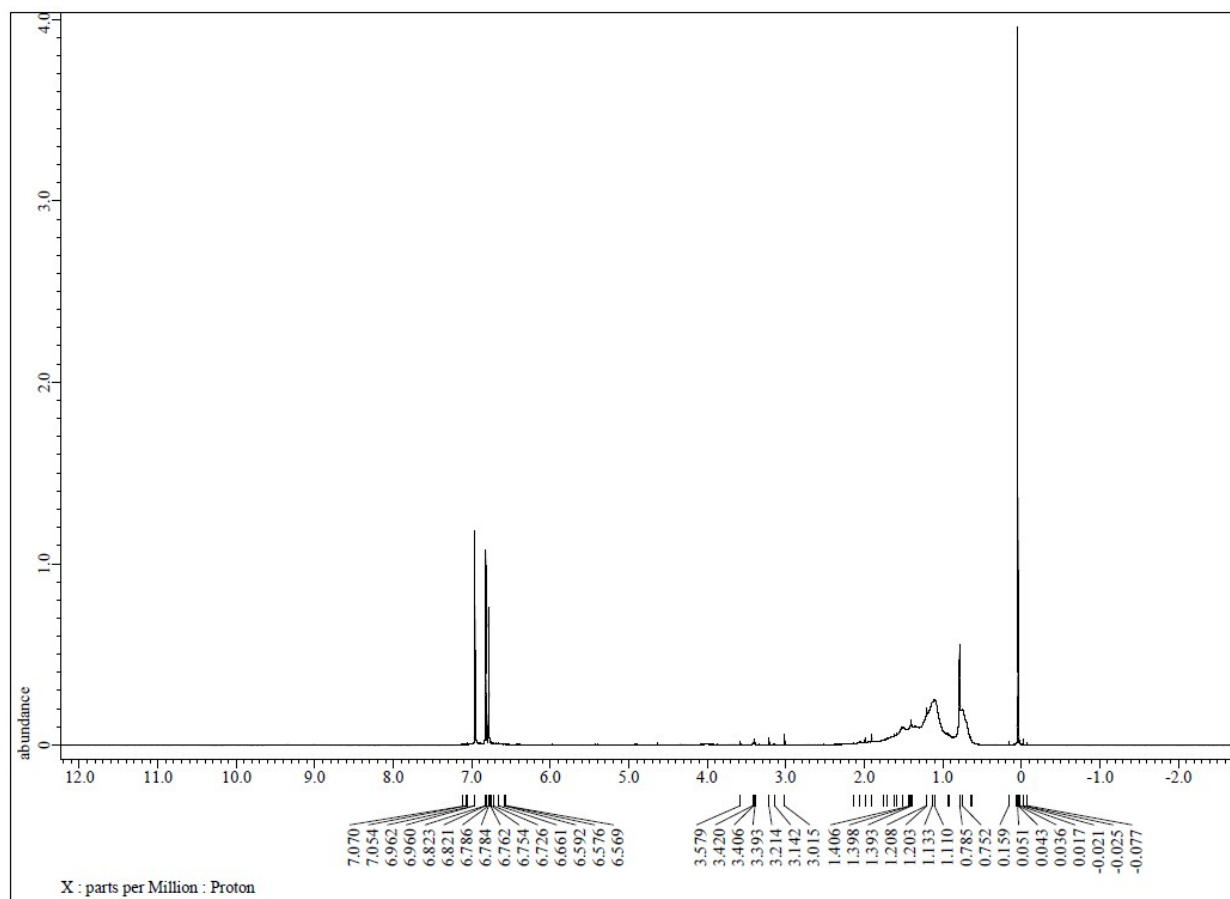

**Figure S5.**  $^1\text{H}$  NMR spectrum of **P2** in  $\text{C}_6\text{D}_5\text{Cl}$  at  $75^\circ\text{C}$ .

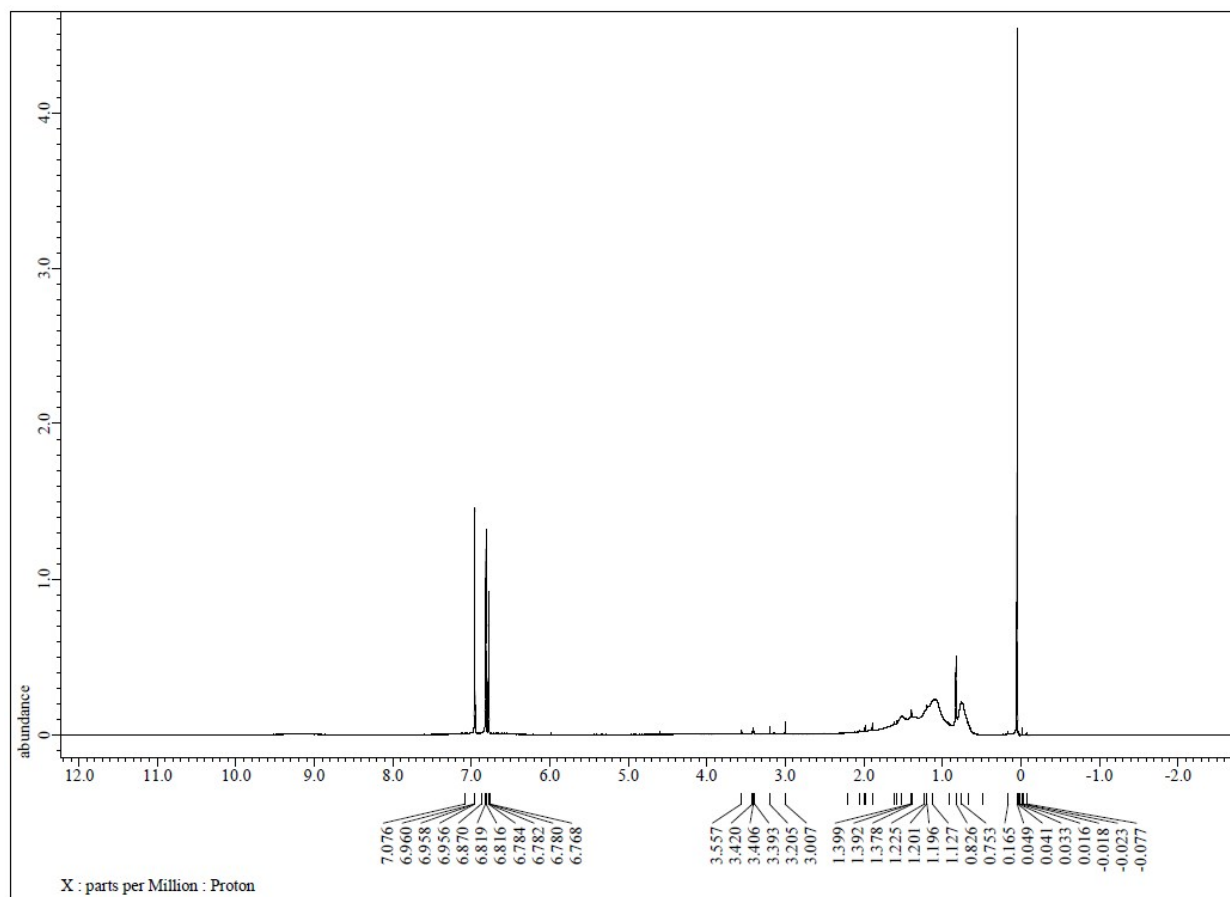

**Figure S6.**  $^1\text{H}$  NMR spectrum of **P2** in  $\text{C}_6\text{D}_5\text{Cl}$  at  $50^\circ\text{C}$ .

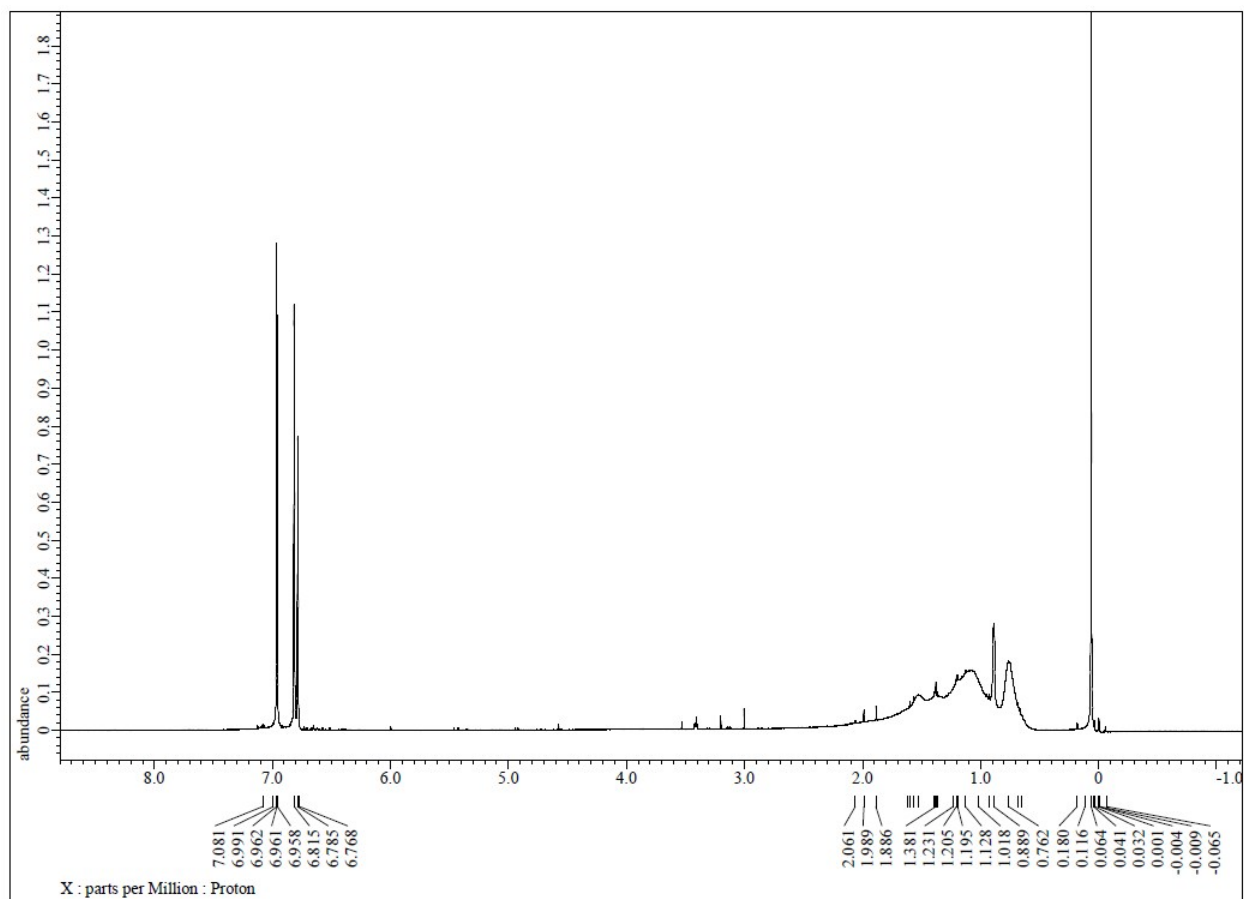

**Figure S7.**  $^1\text{H}$  NMR spectrum of **P2** in  $\text{C}_6\text{D}_5\text{Cl}$  at  $25^\circ\text{C}$ .

2 GPC of polymers

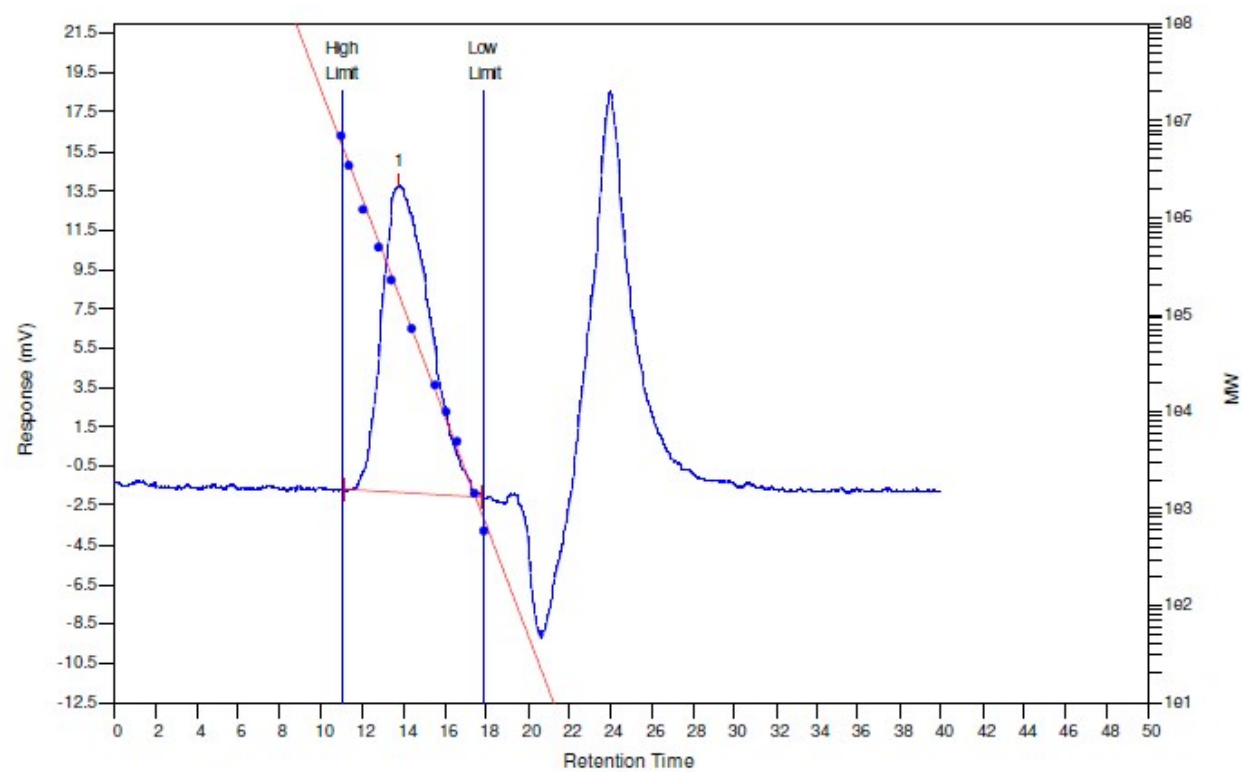

#### MW Averages

| Peak No | Mp     | Mn    | Mw     | Mz     | Mz+1   | Mv     | PD      |
|---------|--------|-------|--------|--------|--------|--------|---------|
| 1       | 166938 | 30904 | 185839 | 526895 | 979751 | 152309 | 6.01343 |

**Figure S3** GPC plot and data of **P1**.



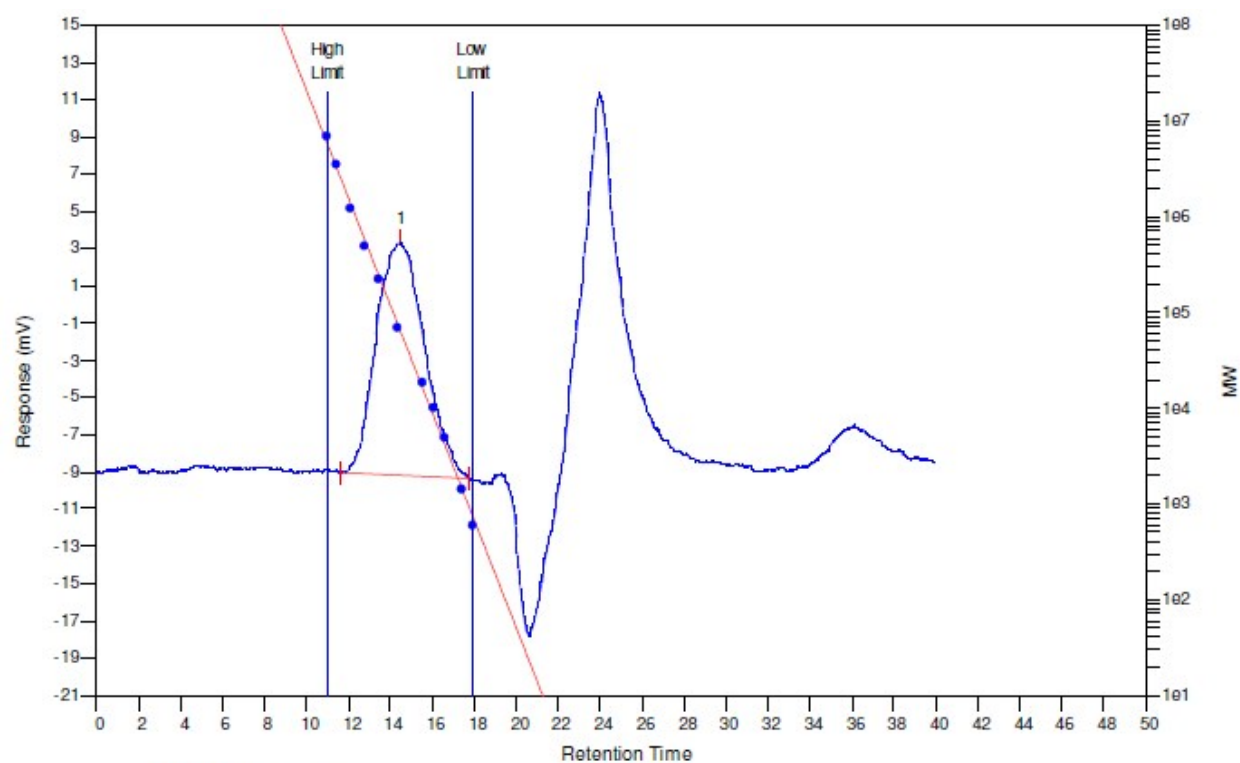

#### MW Averages

| Peak No | Mp    | Mn    | Mw     | Mz     | Mz+1   | Mv     | PD      |
|---------|-------|-------|--------|--------|--------|--------|---------|
| 1       | 61930 | 23879 | 126472 | 374589 | 722773 | 103286 | 5.29637 |

**Figure S4** GPC plot and data of **P2**.

### 3 Cyclic voltammograms of polymers

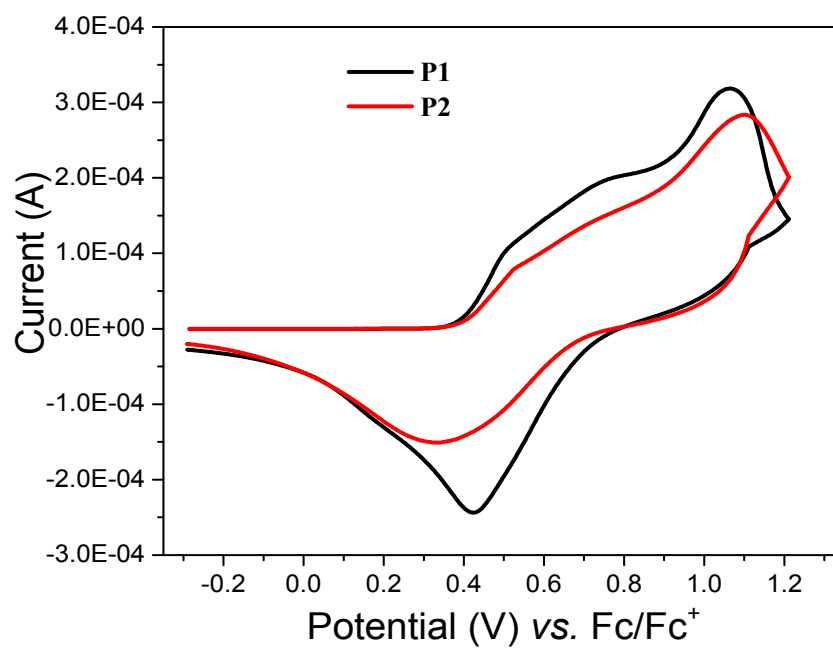

**Figure S5** Cyclic voltammograms of **P1** and **P2** thin films in 0.1M LiClO<sub>4</sub>/ACN electrolyte/solvent couple at a scan rate of 50 mV/s calibrated vs. ferrocene/ferrocenium couple.

### 4 XRD spectra of polymer thin films

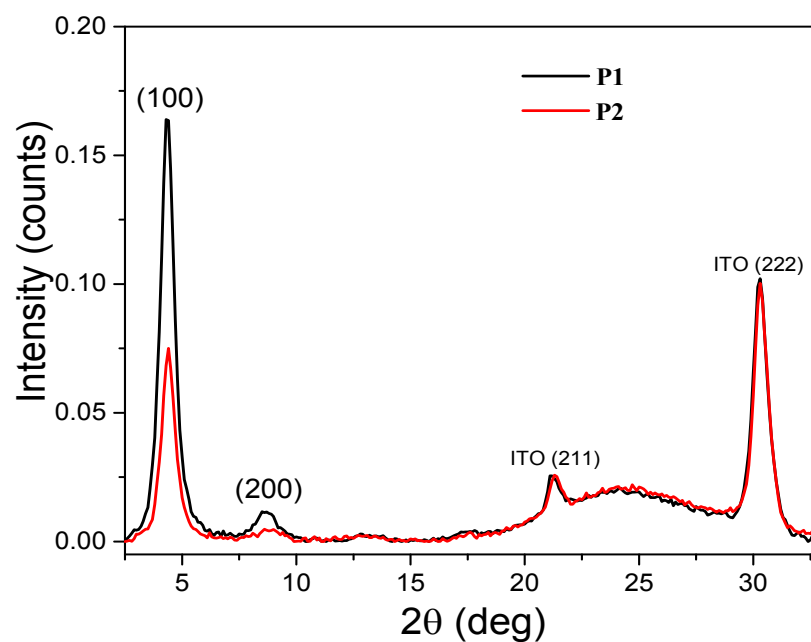

**Figure S6** XRD spectra of **P1** and **P2** thin films drop-cast on ITO/glass substrates.

## 5 Redox stability of ECDs

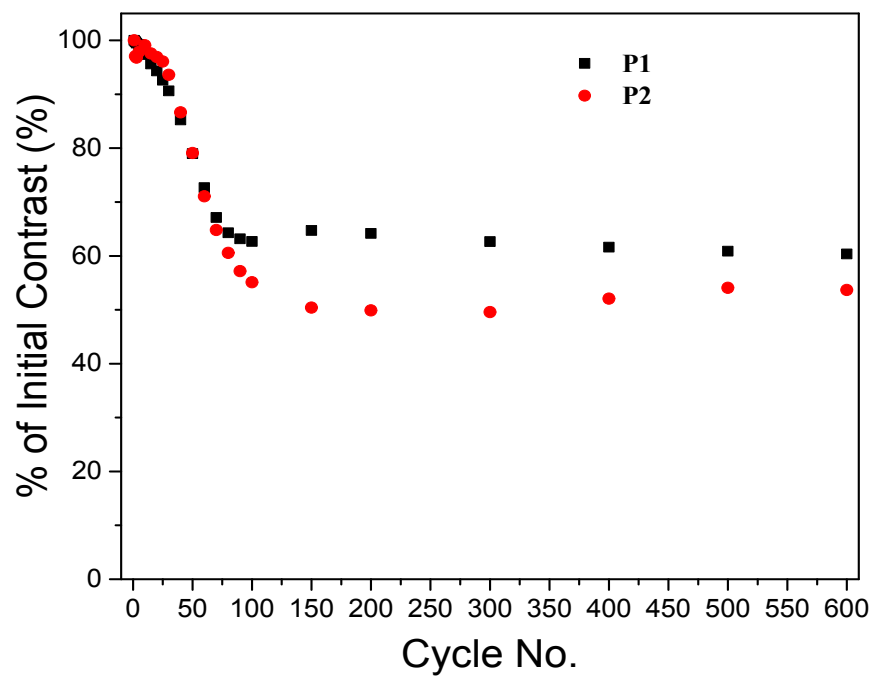

**Figure S7** Degradation profiles of **P1** and **P2** ECDs cycled between +1.6 and -1.6 V at a residence time of 20 s at 1285 nm.
